# Supplementary material for: Serum C-X-C motif chemokine 13 is elevated in early and established rheumatoid arthritis and correlates with rheumatoid factor levels
Source: PubMed Central journal article supplement (PMC4060390; doi:10.1186/ar4552), 2014-04-25
Supplement: ar4552-S1.pdf [file ar4552-S1.pdf]

# Additional Figure 1

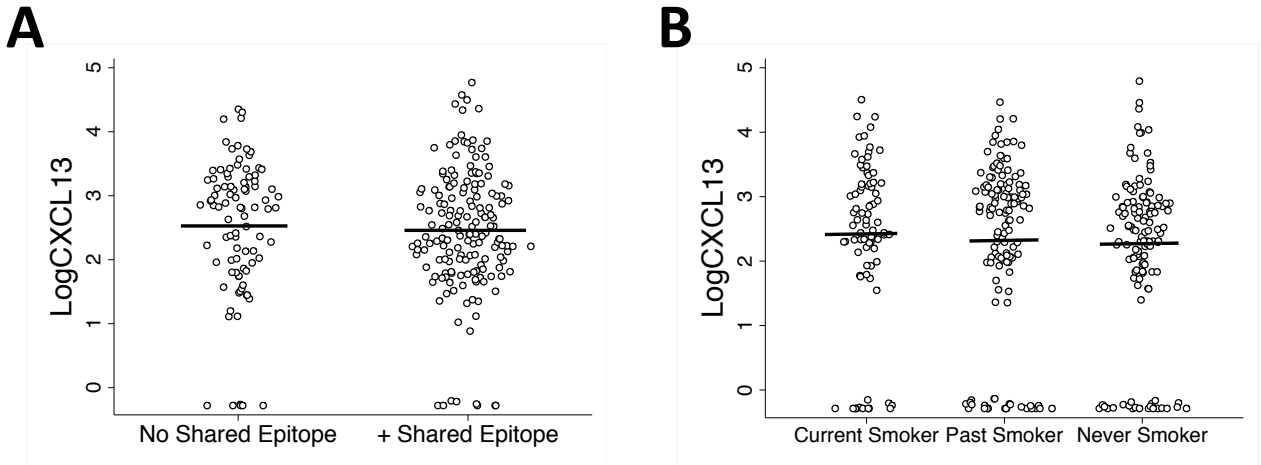

**Additional Figure 1.** Evaluation of combined data from seropositive patients from the Dartmouth and Sherbrooke Cohorts does not identify any relationship with shared epitope status or smoking. **A**, LogCXCL13 levels do not vary based on the presence or absence of the shared epitope (n=258, p=0.73). **B**, LogCXCL13 levels have no relationship with smoking whether comparing current smokers (n=80) to past smokers (n=129, p=0.69), current smokers to never smokers (n=125, p=0.28), or current smokers to both past and never smokers (p=0.42).
